# Supplementary material for: Uncertainty quantification of flood mitigation predictions and implications for interventions
Source: Copernicus journal article supplement (doi:10.5194/nhess-19-1737-2019), 2019-08-13

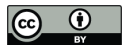

*Supplement of*

## **Uncertainty quantification of flood mitigation predictions and implications for interventions**

**Koen D. Berends et al.**

*Correspondence to:* K. D. Berends ([k.d.berends@utwente.nl](mailto:k.d.berends@utwente.nl))

The copyright of individual parts of the supplement might differ from the CC BY 4.0 License.

Dike Relocation  
DIKERELOC

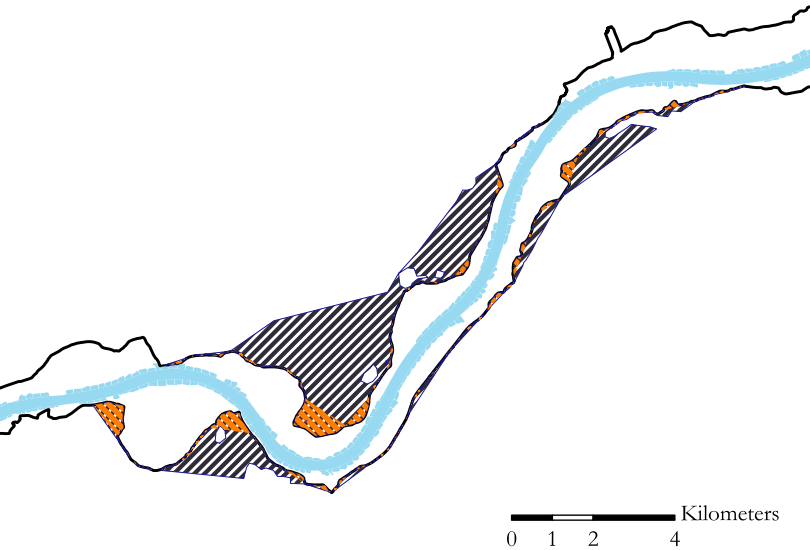

Side channels  
SIDECHAN

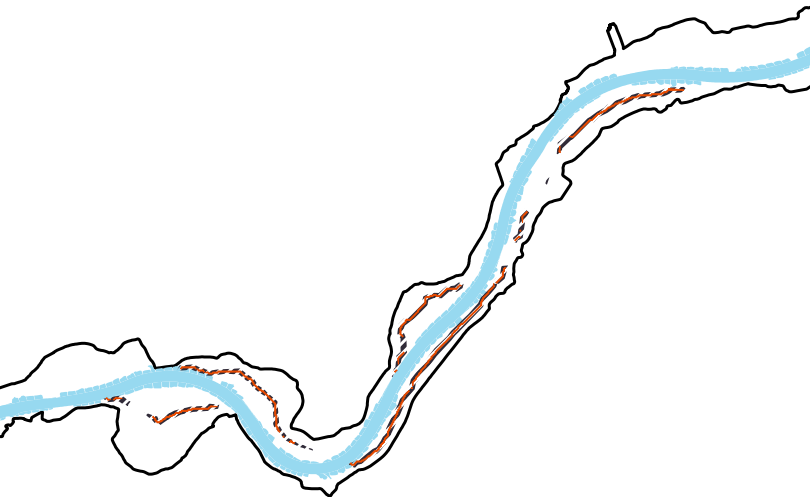

Groyne lowering  
GROYNLOW

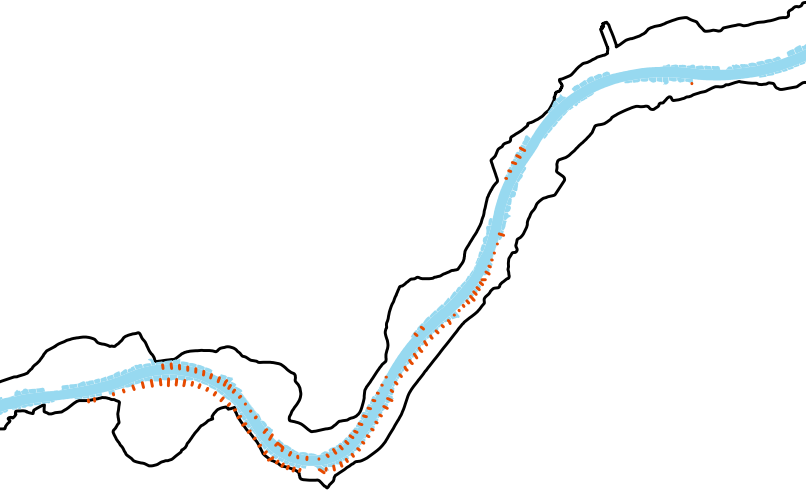

Legend

- Reference
- Extend of floodplain
  - Main channel
- Altered by intervention:
- High-intensity intervention
  - Low-intensity intervention
  - Lowered groyne/minor embankment

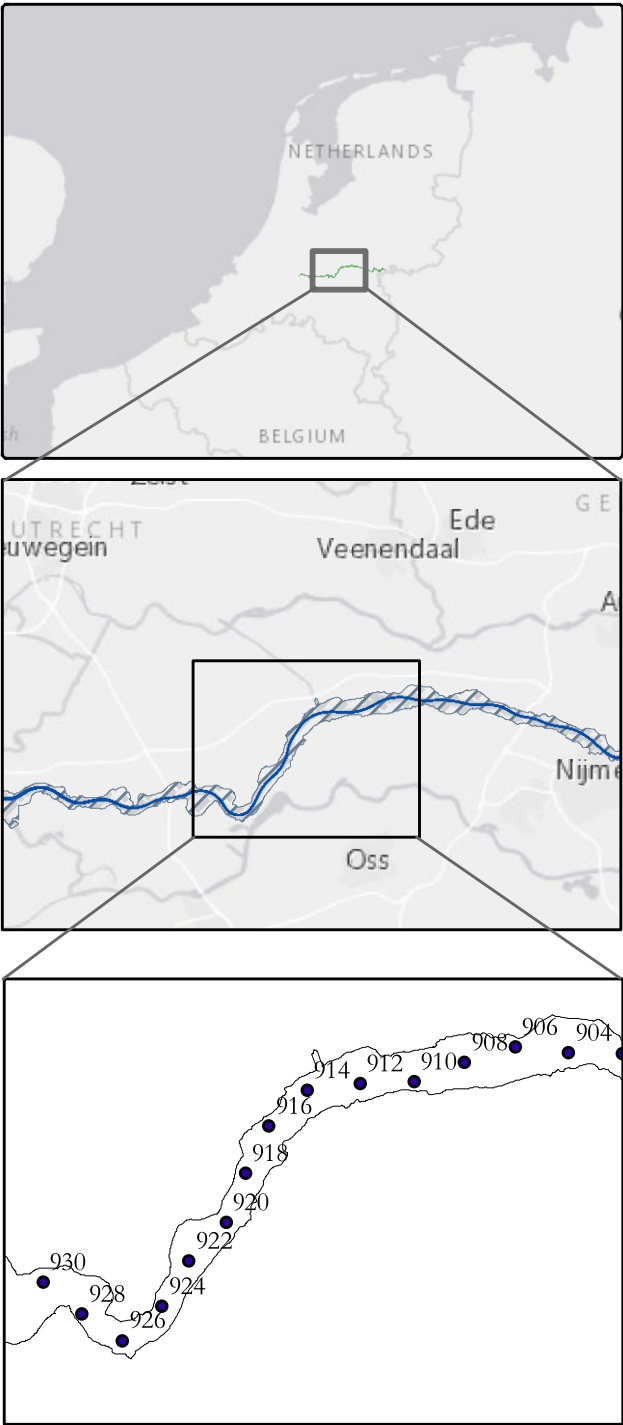

Service Layer Credits: Esri, HERE, Garmin, © OpenStreetMap contributors, and the GIS user community

Floodplain lowering  
FLPLOW

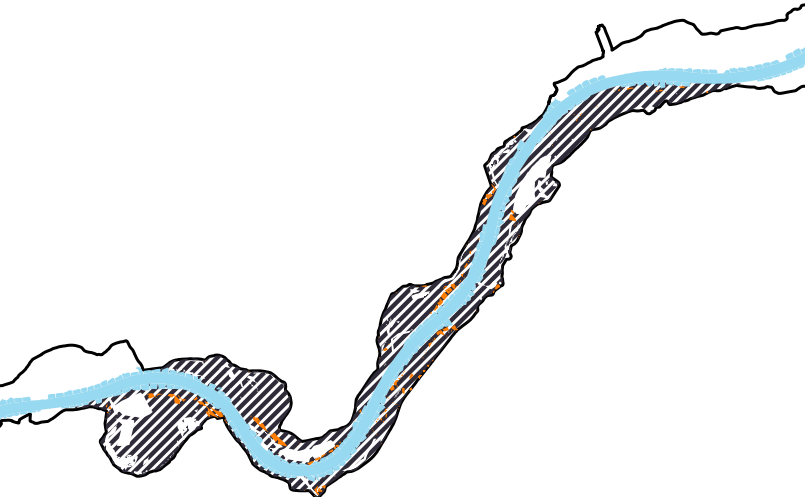

Floodplain smoothing  
FLPSMOOTH

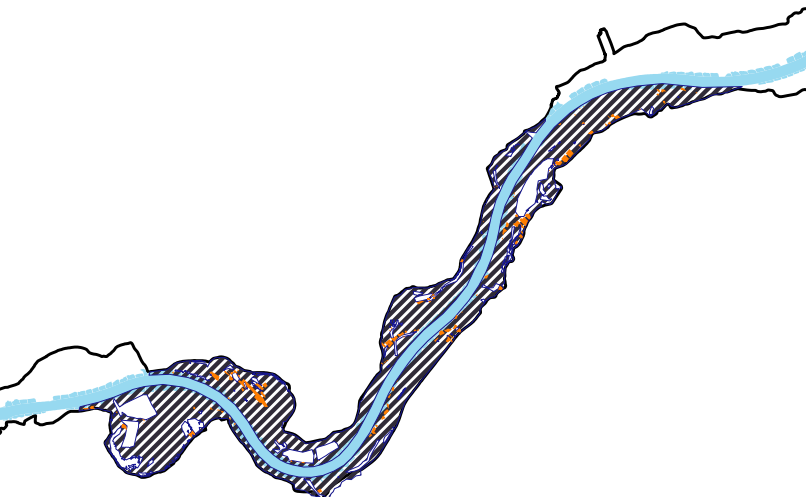

Minor embankment lowering  
MINEMBLOW

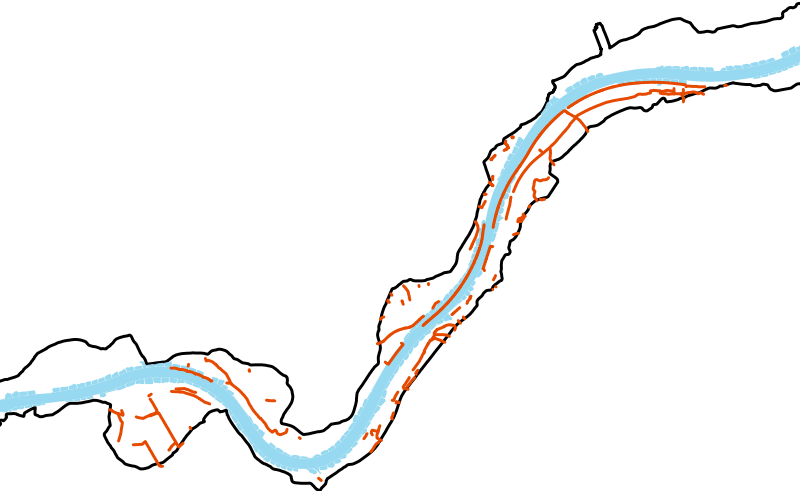

Supplement: Supplementary file 1 [file nhess-19-1737-2019-supplement.pdf]
